# Supplementary material for: The Algicidal Bacterium Kordia algicida Shapes a Natural Plankton Community
Source: PubMed Central journal article supplement (PMC6585488; doi:10.1128/aem.02779-18), 2019-03-22
Supplement: AEM.02779-18-s0001.pdf [file AEM.02779-18-s0001.pdf]

1 **Supplementary Information**

2 **The algicidal bacterium *Kordia algicida* shapes a natural plankton community**

3 **Arite Bigalke<sup>1\*</sup>, Nils Meyer<sup>1\*</sup>, Lydia Papanikolopoulou<sup>1</sup>, Karen Helen Wiltshire<sup>2,3</sup>, Georg**  
4 **Pohnert<sup>1,4#</sup>**

5 \* contributed equally

6 <sup>1</sup>Institute for Inorganic and Analytical Chemistry, Bioorganic Analytics, Friedrich Schiller  
7 University Jena, Lessingstrasse 8, D-07743 Jena, Germany

8 <sup>2</sup>Alfred-Wegener-Institut, Helmholtz-Zentrum für Polar- und Meeresforschung, Biologische  
9 Anstalt Helgoland, P.O. Box 180, 27483, Germany

10 <sup>3</sup>Alfred-Wegener-Institut, Helmholtz-Zentrum für Polar- und Meeresforschung, Biologische  
11 Anstalt Helgoland, Wadden Sea station, 25992, List, Germany

12 <sup>4</sup>Max Planck Institute for Chemical Ecology, Hans Knöll Str. 8, D-07745 Jena, Germany

13

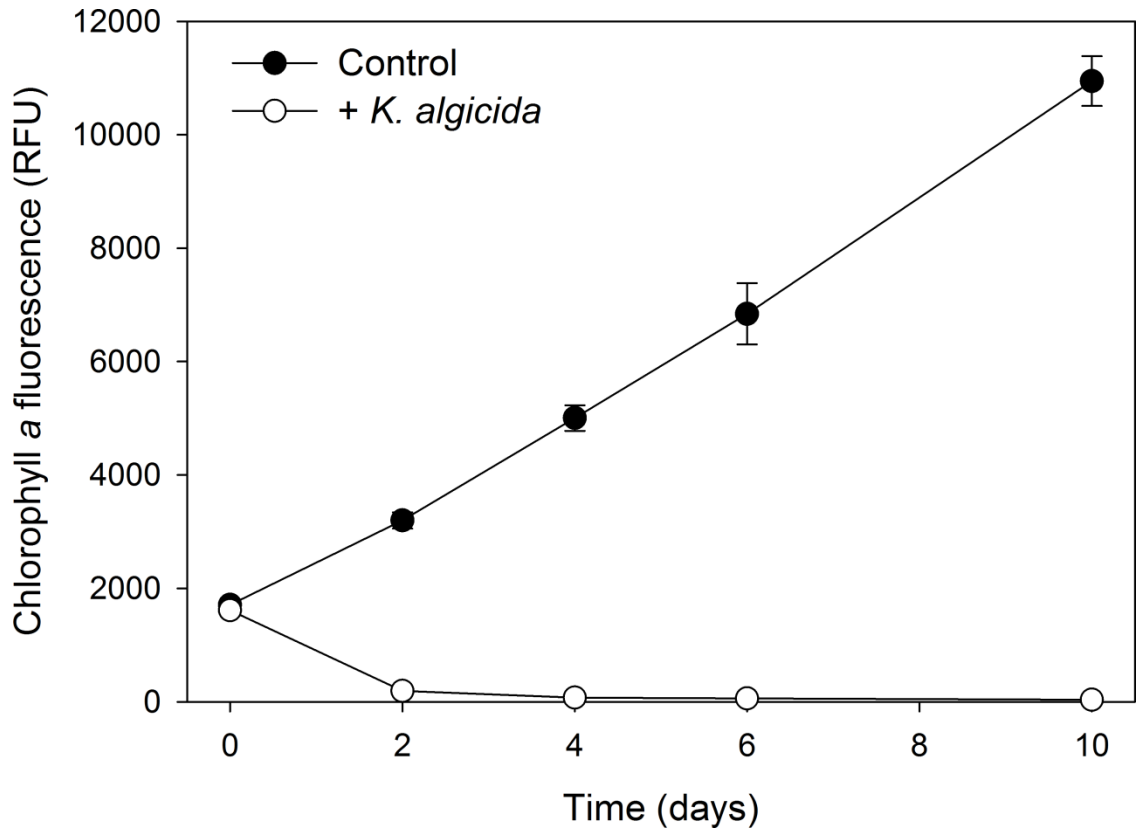

14  
 15 **Fig. S1** *Chaetoceros socialis* mono culture in laboratory experiment. Cultures of *C. socialis* (40  
 16 ml, n=3) are grown in the presence (“+ *K. algicida*”, final OD<sub>550</sub> 0.01) or absence (“Control”) of  
 17 *Kordia algicida*.

18  
 19 **Table S1:** Statistics for stability of chlorophyll *a* fluorescence in control treatments. Given are p-  
 20 values from Bonferroni *post-hoc* test after one-way ANOVA (P = 0.018).

| comparison      | p-value |
|-----------------|---------|
| day 0 vs. day 1 | 1.000   |
| day 0 vs. day 2 | 1.000   |
| day 0 vs. day 3 | 0.219   |
| day 0 vs. day 4 | 1.000   |
| day 0 vs. day 5 | 1.000   |
| day 0 vs. day 6 | 0.950   |
| day 0 vs. day 7 | 1.000   |
| day 0 vs. day 8 | 1.000   |

21

22

23 **Table S2:** Statistics for stability of phytoplankton cell counts in control treatment. One-way  
24 ANOVA for *Phaeocystis* sp. cell counts displayed significant differences within the dataset ( $P <$   
25  $0.001$ ). *Chaetoceros socialis* cell counts were not significantly different in one-way ANOVA ( $P$   
26  $= 0.176$ ). Given are p-values from Bonferroni *post-hoc* test of *Phaeocystis* sp.

| comparison |     |       | p-value   |
|------------|-----|-------|-----------|
| day 0      | vs. | day 2 | 1.000     |
| day 0      | vs. | day 4 | 0.070     |
| day 0      | vs. | day 6 | 1.000     |
| day 0      | vs. | day 8 | $< 0.001$ |

27

28

29 **Table S3:** Statistical analysis of differences in chlorophyll *a* fluorescence between treatments.  
 30 Given are two-tailed p-values from an unpaired t-test.

| constant | Comparison        |                        | p-value                |
|----------|-------------------|------------------------|------------------------|
| day 0    | control           | vs. low <i>Kordia</i>  | 0.129                  |
|          | control           | vs. high <i>Kordia</i> | 0.792                  |
|          | low <i>Kordia</i> | vs. high <i>Kordia</i> | 0.183                  |
| day 1    | control           | vs. low <i>Kordia</i>  | < 0.001                |
|          | control           | vs. high <i>Kordia</i> | < 0.001                |
|          | low <i>Kordia</i> | vs. high <i>Kordia</i> | 0.315                  |
| day 2    | control           | vs. low <i>Kordia</i>  | < 0.001                |
|          | control           | vs. high <i>Kordia</i> | < 0.001                |
|          | low <i>Kordia</i> | vs. high <i>Kordia</i> | 0.600                  |
| day 3    | control           | vs. low <i>Kordia</i>  | 0.003                  |
|          | control           | vs. high <i>Kordia</i> | 0.003                  |
|          | low <i>Kordia</i> | vs. high <i>Kordia</i> | 0.270                  |
| day 4    | control           | vs. low <i>Kordia</i>  | < 0.001                |
|          | control           | vs. high <i>Kordia</i> | < 0.001                |
|          | low <i>Kordia</i> | vs. high <i>Kordia</i> | 0.081                  |
| day 5    | control           | vs. low <i>Kordia</i>  | < 0.001                |
|          | control           | vs. high <i>Kordia</i> | < 0.001                |
|          | low <i>Kordia</i> | vs. high <i>Kordia</i> | 0.047                  |
| day 6    | control           | vs. low <i>Kordia</i>  | no normal distribution |
|          | control           | vs. high <i>Kordia</i> | < 0.001                |
|          | low <i>Kordia</i> | vs. high <i>Kordia</i> | 0.008                  |
| day 7    | control           | vs. low <i>Kordia</i>  | < 0.001                |
|          | control           | vs. high <i>Kordia</i> | < 0.001                |
|          | low <i>Kordia</i> | vs. high <i>Kordia</i> | 0.007                  |
| day 8    | control           | vs. low <i>Kordia</i>  | < 0.001                |
|          | control           | vs. high <i>Kordia</i> | < 0.001                |
|          | low <i>Kordia</i> | vs. high <i>Kordia</i> | 0.074                  |

31

32

33 **Table S4:** Statistical analysis of differences in phytoplankton cell counts (*Chaetoceros socialis*  
 34 and *Phaeocystis* sp.) between treatments. Given are two-tailed p-values from an unpaired t-test.

| species            | constant          | comparison        |                    |                    | p-value                |
|--------------------|-------------------|-------------------|--------------------|--------------------|------------------------|
| <i>C. socialis</i> | day 0             | control           | vs.                | low <i>Kordia</i>  | 0.463                  |
|                    |                   | control           | vs.                | high <i>Kordia</i> | 0.474                  |
|                    |                   | low <i>Kordia</i> | vs.                | high <i>Kordia</i> | 0.929                  |
|                    | day 2             | control           | vs.                | low <i>Kordia</i>  | 0.153                  |
|                    |                   | control           | vs.                | high <i>Kordia</i> | 0.103                  |
|                    |                   | low <i>Kordia</i> | vs.                | high <i>Kordia</i> | 0.907                  |
|                    | day 4             | control           | vs.                | low <i>Kordia</i>  | 0.022                  |
|                    |                   | control           | vs.                | high <i>Kordia</i> | 0.002                  |
|                    |                   | low <i>Kordia</i> | vs.                | high <i>Kordia</i> | 0.329                  |
|                    | day 6             | control           | vs.                | low <i>Kordia</i>  | <0.001                 |
|                    |                   | control           | vs.                | high <i>Kordia</i> | 0.005                  |
|                    |                   | low <i>Kordia</i> | vs.                | high <i>Kordia</i> | 0.936                  |
| day 8              | control           | vs.               | low <i>Kordia</i>  | 0.007              |                        |
|                    | control           | vs.               | high <i>Kordia</i> | 0.006              |                        |
|                    | low <i>Kordia</i> | vs.               | high <i>Kordia</i> | 0.261              |                        |
| <i>P. globosa</i>  | day 0             | control           | vs.                | low <i>Kordia</i>  | 0.697                  |
|                    |                   | control           | vs.                | high <i>Kordia</i> | no normal distribution |
|                    |                   | low <i>Kordia</i> | vs.                | high <i>Kordia</i> | 0.240                  |
|                    | day 2             | control           | vs.                | low <i>Kordia</i>  | 0.064                  |
|                    |                   | control           | vs.                | high <i>Kordia</i> | <0.001                 |
|                    |                   | low <i>Kordia</i> | vs.                | high <i>Kordia</i> | 0.504                  |
|                    | day 4             | control           | vs.                | low <i>Kordia</i>  | 0.577                  |
|                    |                   | control           | vs.                | high <i>Kordia</i> | 0.106                  |
|                    |                   | low <i>Kordia</i> | vs.                | high <i>Kordia</i> | 0.735                  |
|                    | day 6             | control           | vs.                | low <i>Kordia</i>  | 0.016                  |
|                    |                   | control           | vs.                | high <i>Kordia</i> | 0.048                  |
|                    |                   | low <i>Kordia</i> | vs.                | high <i>Kordia</i> | 0.354                  |
|                    | day 8             | control           | vs.                | low <i>Kordia</i>  | 0.047                  |
|                    |                   | control           | vs.                | high <i>Kordia</i> | 0.009                  |
|                    |                   | low <i>Kordia</i> | vs.                | high <i>Kordia</i> | 0.920                  |

35

36

37 **Table S5** Statistical analysis of total bacterial abundances. One-way ANOVA within low *Kordia*  
 38 treatment ( $P = 0.033$ ) and high *Kordia* treatment ( $P = 0.012$ ) over time displayed significant  
 39 differences. In control mesocosms bacterial abundance was not significantly different between  
 40 time points in one-way ANOVA ( $P = 0.075$ ). Given are p-values from Bonferroni *post-hoc* test.

| treatment          | comparison |     |       | p-value |
|--------------------|------------|-----|-------|---------|
| low <i>Kordia</i>  | day 0      | vs. | day 2 | 0.036   |
|                    | day 0      | vs. | day 4 | 0.034   |
|                    | day 0      | vs. | day 6 | 0.032   |
|                    | day 0      | vs. | day 8 | 0.247   |
| high <i>Kordia</i> | day 0      | vs. | day 2 | 0.037   |
|                    | day 0      | vs. | day 4 | 0.163   |
|                    | day 0      | vs. | day 6 | 0.621   |
|                    | day 0      | vs. | day 8 | 0.005   |

41  
 42 **Table S6** Statistical analysis of DOC concentrations. One-way ANOVA within high *Kordia*  
 43 treatment ( $P = 0.005$ ) and *Kordia* in sterile-filtered seawater ( $P < 0.001$ ) over time displayed  
 44 significant differences. In control mesocosms DOC concentration was not significantly different  
 45 between time points in one-way ANOVA ( $P = 0.064$ ). Given are p-values from Holm-Sidak *post-*  
 46 *hoc* test.

| treatment                                      | comparison |     |       | p-value |
|------------------------------------------------|------------|-----|-------|---------|
| high <i>Kordia</i>                             | day 0      | vs. | day 4 | 0.010   |
|                                                | day 0      | vs. | day 8 | 0.004   |
| <i>Kordia</i> in sterile-<br>filtered seawater | day 0      | vs. | day 4 | < 0.001 |
|                                                | day 0      | vs. | day 8 | < 0.001 |

47

48

49 **Table S7** Statistical analysis of phosphate concentrations. ANOVA on Ranks within *Kordia* in  
 50 sterile-filtered seawater over time displayed significant differences ( $P = 0.025$ ). Within control  
 51 mesocosms ( $P = 0.929$ ) and high *Kordia* treatments ( $P = 0.086$ ) phosphate concentration was not  
 52 significantly different between time points in ANOVA on Ranks. Given are p-values from Tukey  
 53 *post-hoc* test.

| treatment                 | comparison |     |       | p-value |
|---------------------------|------------|-----|-------|---------|
| <i>Kordia</i> in sterile- | day 0      | vs. | day 4 | 0.822   |
| filtered seawater         | day 0      | vs. | day 8 | 0.207   |

54

55 **Table S8** Statistical analysis of ammonium concentrations. One-way ANOVA within high  
 56 *Kordia* treatment over time displayed significant differences ( $P = 0.014$ ). Given are p-values from  
 57 Holm-Sidak *post-hoc* test.

| treatment          | comparison |     |       | p-value |
|--------------------|------------|-----|-------|---------|
| high <i>Kordia</i> | day 0      | vs. | day 4 | 0.022   |
|                    | day 0      | vs. | day 8 | 0.011   |

58
